# Supplementary material for: Self-Assembly of a 1D Hydrogen-Bonded Polymer from a Hexamethyltetraaza Macrocyclic Nickel(II) Complex and Isophthalic Acid
Source: Molecules. 2013 Jun 6;18(6):6608–19. doi: 10.3390/molecules18066608 (PMC6270525; doi:10.3390/molecules18066608)
Supplement: Supplementary file 1 [file molecules-18-06608-s001.txt]

data_(1)
 
_audit_creation_method            SHELXL-97
_chemical_name_systematic
;
 ?
;
_chemical_name_common             ?
_chemical_melting_point           ?
_chemical_formula_moiety          ?
_chemical_formula_sum             'C48 H96 N8 Ni2 O16'
_chemical_formula_weight          1157.94
 
loop_
 _atom_type_symbol
 _atom_type_description
 _atom_type_scat_dispersion_real
 _atom_type_scat_dispersion_imag
 _atom_type_scat_source
 'C'  'C'   0.0030   0.0020
 'International Tables Vol C Tables 4.2.6.8 and 6.1.1.4'
 'H'  'H'   0.0000   0.0000
 'International Tables Vol C Tables 4.2.6.8 and 6.1.1.4'
 'N'  'N'   0.0060   0.0030
 'International Tables Vol C Tables 4.2.6.8 and 6.1.1.4'
 'Ni'  'Ni'   0.3390   1.1120
 'International Tables Vol C Tables 4.2.6.8 and 6.1.1.4'
 'O'  'O'   0.0110   0.0060
 'International Tables Vol C Tables 4.2.6.8 and 6.1.1.4'
 
_symmetry_cell_setting            triclinic
_symmetry_space_group_name_H-M    'P -1'
 
loop_
 _symmetry_equiv_pos_as_xyz
 'x, y, z'
 '-x, -y, -z'
 
_cell_length_a                    8.602(2)
_cell_length_b                    10.684(7)
_cell_length_c                    16.550(3)
_cell_angle_alpha                 91.04(4)
_cell_angle_beta                  94.09(2)
_cell_angle_gamma                 111.09(4)
_cell_volume                      1413.9(10)
_cell_formula_units_Z             1
_cell_measurement_temperature     293(2)
_cell_measurement_reflns_used     24
_cell_measurement_theta_min       4.8155
_cell_measurement_theta_max       11.8485
 
_exptl_crystal_description        prism
_exptl_crystal_colour             brown
_exptl_crystal_size_max           0.4
_exptl_crystal_size_mid           0.3
_exptl_crystal_size_min           0.1
_exptl_crystal_density_meas       ?
_exptl_crystal_density_diffrn     1.360
_exptl_crystal_density_method     'not measured'
_exptl_crystal_F_000              624
_exptl_absorpt_coefficient_mu     0.738
_exptl_absorpt_correction_type    psi-scan
_exptl_absorpt_correction_T_min   0.7122
_exptl_absorpt_correction_T_max   0.9145
_exptl_absorpt_process_details
;
North A.C.T., Phillips D.C. & Mathews F.S. (1968) Acta. Cryst. A24, 351
Number of psi-scan sets used was   3
Theta correction was applied.
Averaged transmission function was used.
No Fourier smoothing was applied.
;
 
_exptl_special_details
;
 ?
;
 
_diffrn_ambient_temperature       293(2)
_diffrn_radiation_wavelength      0.71073
_diffrn_radiation_type            MoK\a
_diffrn_radiation_source          'fine-focus sealed tube'
_diffrn_radiation_monochromator   graphite
_diffrn_measurement_device_type   ?
_diffrn_measurement_method        ?
_diffrn_detector_area_resol_mean  ?
_diffrn_standards_number          ?
_diffrn_standards_interval_count  ?
_diffrn_standards_interval_time   120
_diffrn_standards_decay_%         1
_diffrn_reflns_number             5729
_diffrn_reflns_av_R_equivalents   0.0817
_diffrn_reflns_av_sigmaI/netI     0.1040
_diffrn_reflns_limit_h_min        -10
_diffrn_reflns_limit_h_max        10
_diffrn_reflns_limit_k_min        -13
_diffrn_reflns_limit_k_max        13
_diffrn_reflns_limit_l_min        -1
_diffrn_reflns_limit_l_max        19
_diffrn_reflns_theta_min          1.23
_diffrn_reflns_theta_max          26.37
_reflns_number_total              5137
_reflns_number_gt                 2988
_reflns_threshold_expression      >2\s(I)
 
_computing_data_collection       'CAD4 Express (Enraf Nonius, 1994)'
_computing_cell_refinement       'CAD4 Express (Enraf Nonius, 1994)'
_computing_data_reduction        'XCAD4 (Harms & Wocadlo, 1995)'
_computing_structure_solution    'SHELXS-97 (Sheldrick, 1997)'
_computing_structure_refinement  'SHELXL-97 (Sheldrick, 1997)'
_computing_molecular_graphics    'Ortep-3 for Windows (Farrugia, 1997)'
_computing_publication_material  'WinGX publication routines (Farrugia, 1999)'
 
_refine_special_details
;
 Refinement of F^2^ against ALL reflections.  The weighted R-factor wR and
 goodness of fit S are based on F^2^, conventional R-factors R are based
 on F, with F set to zero for negative F^2^. The threshold expression of
 F^2^ > 2\s(F^2^) is used only for calculating R-factors(gt) etc. and is
 not relevant to the choice of reflections for refinement.  R-factors based
 on F^2^ are statistically about twice as large as those based on F, and R-
 factors based on ALL data will be even larger.
;
 
_refine_ls_structure_factor_coef  Fsqd
_refine_ls_matrix_type            full
_refine_ls_weighting_scheme       calc
_refine_ls_weighting_details
 'calc w=1/[\s^2^(Fo^2^)+(0.2000P)^2^+0.0000P] where P=(Fo^2^+2Fc^2^)/3'
_atom_sites_solution_primary      direct
_atom_sites_solution_secondary    difmap
_atom_sites_solution_hydrogens    geom
_refine_ls_hydrogen_treatment     mixed
_refine_ls_extinction_method      none
_refine_ls_extinction_coef        none
_refine_ls_number_reflns          5137
_refine_ls_number_parameters      369
_refine_ls_number_restraints      0
_refine_ls_R_factor_all           0.1742
_refine_ls_R_factor_gt            0.0811
_refine_ls_wR_factor_ref          0.3391
_refine_ls_wR_factor_gt           0.2224
_refine_ls_goodness_of_fit_ref    1.184
_refine_ls_restrained_S_all       1.184
_refine_ls_shift/su_max           0.675
_refine_ls_shift/su_mean          0.002
 
loop_
 _atom_site_label
 _atom_site_type_symbol
 _atom_site_fract_x
 _atom_site_fract_y
 _atom_site_fract_z
 _atom_site_U_iso_or_equiv
 _atom_site_adp_type
 _atom_site_occupancy
 _atom_site_symmetry_multiplicity
 _atom_site_calc_flag
 _atom_site_refinement_flags
 _atom_site_disorder_assembly
 _atom_site_disorder_group
Ni1 Ni 0.0000 0.5000 0.5000 0.0273(5) Uani 1 2 d S . .
Ni2 Ni 0.5000 0.0000 0.0000 0.0301(5) Uani 1 2 d S . .
N1 N -0.2256(9) 0.3592(7) 0.5381(4) 0.0326(16) Uani 1 1 d . . .
H1 H -0.2601 0.4102 0.5720 0.039 Uiso 1 1 calc R . .
N2 N 0.1200(9) 0.4429(7) 0.5924(4) 0.0315(16) Uani 1 1 d . . .
H2 H 0.1556 0.3804 0.5702 0.038 Uiso 1 1 calc R . .
N3 N 0.6323(9) 0.1620(7) 0.0609(5) 0.0375(18) Uani 1 1 d . . .
H3 H 0.5588 0.1819 0.0908 0.045 Uiso 1 1 calc R . .
N4 N 0.5137(10) -0.1039(8) 0.0886(5) 0.045(2) Uani 1 1 d . . .
H4 H 0.4309 -0.1035 0.1198 0.054 Uiso 1 1 calc R . .
O1 O 0.0326(8) 0.3490(6) 0.4327(4) 0.0413(16) Uani 1 1 d . . .
O2 O 0.2269(9) 0.4449(6) 0.3471(4) 0.0479(18) Uani 1 1 d . . .
O3 O 0.2611(10) -0.0414(7) 0.1628(5) 0.061(2) Uani 1 1 d . . .
O4 O 0.3625(10) 0.1709(7) 0.1503(5) 0.0537(19) Uani 1 1 d . . .
OW1 O 0.3828(14) 0.4120(9) 0.0991(6) 0.066(2) Uani 1 1 d . . .
HO1 H 0.348(12) 0.310(11) 0.115(6) 0.05(3) Uiso 1 1 d . . .
HO2 H 0.307(9) 0.372(8) 0.078(5) 0.00(2) Uiso 1 1 d . . .
OW2 O 0.2563(13) 0.5502(9) 0.1972(7) 0.075(3) Uani 1 1 d . . .
HO3 H 0.258(12) 0.530(10) 0.256(7) 0.04(3) Uiso 1 1 d . . .
HO4 H 0.255(15) 0.487(12) 0.161(8) 0.06(4) Uiso 1 1 d . . .
OW3 O 0.0474(16) -0.3123(11) 0.1545(8) 0.077(3) Uani 1 1 d . . .
HO5 H 0.03(2) -0.340(18) 0.194(11) 0.11(7) Uiso 1 1 d . . .
HO6 H 0.12(2) -0.271(19) 0.127(13) 0.14(8) Uiso 1 1 d . . .
OW4 O 0.7215(15) -0.4218(12) 0.0659(8) 0.084(3) Uani 1 1 d . . .
HO7 H 0.760(11) -0.382(8) 0.094(5) 0.00(2) Uiso 1 1 d . . .
HO8 H 0.653(17) -0.437(14) 0.027(9) 0.08(5) Uiso 1 1 d . . .
C1 C -0.3819(11) 0.2874(9) 0.4822(6) 0.038(2) Uani 1 1 d . . .
C2 C 0.4046(11) 0.6134(10) 0.5739(6) 0.045(2) Uani 1 1 d . . .
H2A H 0.5111 0.6568 0.6053 0.054 Uiso 1 1 calc R . .
H2B H 0.4156 0.5416 0.5409 0.054 Uiso 1 1 calc R . .
C3 C 0.2740(12) 0.5469(10) 0.6348(6) 0.042(2) Uani 1 1 d . . .
H3A H 0.2391 0.6177 0.6565 0.050 Uiso 1 1 calc R . .
C4 C -0.0094(12) 0.3685(10) 0.6457(6) 0.045(2) Uani 1 1 d . . .
H4A H -0.0359 0.4312 0.6801 0.054 Uiso 1 1 calc R . .
H4B H 0.0321 0.3130 0.6802 0.054 Uiso 1 1 calc R . .
C5 C -0.1704(13) 0.2780(10) 0.5929(7) 0.053(3) Uani 1 1 d . . .
H5A H -0.1465 0.2096 0.5624 0.064 Uiso 1 1 calc R . .
H5B H -0.2579 0.2335 0.6278 0.064 Uiso 1 1 calc R . .
C6 C -0.5356(12) 0.2384(11) 0.5334(7) 0.054(3) Uani 1 1 d . . .
H6A H -0.5421 0.3133 0.5640 0.082 Uiso 1 1 calc R . .
H6B H -0.5239 0.1728 0.5698 0.082 Uiso 1 1 calc R . .
H6C H -0.6358 0.1987 0.4980 0.082 Uiso 1 1 calc R . .
C7 C -0.3715(14) 0.1765(10) 0.4364(7) 0.058(3) Uani 1 1 d . . .
H7A H -0.3559 0.1122 0.4727 0.087 Uiso 1 1 calc R . .
H7B H -0.2787 0.2077 0.4035 0.087 Uiso 1 1 calc R . .
H7C H -0.4730 0.1350 0.4022 0.087 Uiso 1 1 calc R . .
C8 C 0.3541(15) 0.5002(12) 0.7046(6) 0.061(3) Uani 1 1 d . . .
H8A H 0.2732 0.4617 0.7428 0.092 Uiso 1 1 calc R . .
H8B H 0.4449 0.5750 0.7303 0.092 Uiso 1 1 calc R . .
H8C H 0.3958 0.4339 0.6855 0.092 Uiso 1 1 calc R . .
C9 C 0.1239(11) 0.3475(9) 0.3772(6) 0.036(2) Uani 1 1 d . . .
C10 C 0.1134(10) 0.2150(8) 0.3494(5) 0.0309(19) Uani 1 1 d . . .
C11 C 0.0232(12) 0.1042(9) 0.3914(6) 0.038(2) Uani 1 1 d . . .
H11 H -0.0300 0.1143 0.4367 0.045 Uiso 1 1 calc R . .
C12 C 0.0150(14) -0.0150(10) 0.3657(7) 0.052(3) Uani 1 1 d . . .
H12 H -0.0460 -0.0911 0.3921 0.062 Uiso 1 1 calc R . .
C13 C 0.0963(13) -0.0263(10) 0.3002(6) 0.046(2) Uani 1 1 d . . .
H13 H 0.0918 -0.1114 0.2839 0.055 Uiso 1 1 calc R . .
C14 C 0.1863(11) 0.0821(8) 0.2557(5) 0.0324(19) Uani 1 1 d . . .
C15 C 0.1928(10) 0.2005(9) 0.2829(6) 0.035(2) Uani 1 1 d . . .
H15 H 0.2529 0.2765 0.2562 0.042 Uiso 1 1 calc R . .
C16 C 0.2769(12) 0.0702(11) 0.1847(6) 0.045(2) Uani 1 1 d . . .
C17 C 0.7802(14) 0.1758(11) 0.1211(8) 0.058(3) Uani 1 1 d . . .
C18 C 0.7168(15) 0.0679(15) 0.1802(7) 0.073(4) Uani 1 1 d . . .
H18A H 0.8027 0.0823 0.2244 0.088 Uiso 1 1 calc R . .
H18B H 0.6203 0.0770 0.2029 0.088 Uiso 1 1 calc R . .
C19 C 0.6695(16) -0.0697(13) 0.1462(9) 0.076(4) Uani 1 1 d . . .
H19 H 0.7614 -0.0836 0.1204 0.091 Uiso 1 1 calc R . .
C20 C 0.4655(16) -0.2407(10) 0.0564(7) 0.060(3) Uani 1 1 d . . .
H20A H 0.4359 -0.3027 0.0998 0.072 Uiso 1 1 calc R . .
H20B H 0.5578 -0.2524 0.0309 0.072 Uiso 1 1 calc R . .
C21 C 0.6834(16) 0.2683(10) 0.0053(7) 0.063(3) Uani 1 1 d . . .
H21A H 0.7804 0.2675 -0.0208 0.076 Uiso 1 1 calc R . .
H21B H 0.7108 0.3550 0.0334 0.076 Uiso 1 1 calc R . .
C22 C 0.844(2) 0.3096(15) 0.1694(12) 0.136(9) Uani 1 1 d . . .
H22A H 0.8861 0.3814 0.1334 0.204 Uiso 1 1 calc R . .
H22B H 0.9312 0.3114 0.2092 0.204 Uiso 1 1 calc R . .
H22C H 0.7534 0.3206 0.1960 0.204 Uiso 1 1 calc R . .
C23 C 0.908(2) 0.155(2) 0.0679(15) 0.157(10) Uani 1 1 d . . .
H23A H 0.9428 0.2267 0.0313 0.235 Uiso 1 1 calc R . .
H23B H 0.8580 0.0708 0.0374 0.235 Uiso 1 1 calc R . .
H23C H 1.0032 0.1543 0.1016 0.235 Uiso 1 1 calc R . .
C24 C 0.621(3) -0.1562(19) 0.2215(13) 0.196(15) Uani 1 1 d . . .
H24A H 0.5881 -0.2495 0.2054 0.294 Uiso 1 1 calc R . .
H24B H 0.5294 -0.1409 0.2444 0.294 Uiso 1 1 calc R . .
H24C H 0.7150 -0.1315 0.2612 0.294 Uiso 1 1 calc R . .
 
loop_
 _atom_site_aniso_label
 _atom_site_aniso_U_11
 _atom_site_aniso_U_22
 _atom_site_aniso_U_33
 _atom_site_aniso_U_23
 _atom_site_aniso_U_13
 _atom_site_aniso_U_12
Ni1 0.0320(9) 0.0280(8) 0.0262(9) 0.0042(6) 0.0057(7) 0.0153(7)
Ni2 0.0339(9) 0.0310(9) 0.0294(9) 0.0033(7) 0.0055(7) 0.0161(7)
N1 0.036(4) 0.028(4) 0.038(4) 0.010(3) 0.010(3) 0.015(3)
N2 0.036(4) 0.021(3) 0.032(4) 0.001(3) -0.006(3) 0.006(3)
N3 0.040(4) 0.030(4) 0.040(4) -0.004(3) 0.006(3) 0.010(3)
N4 0.045(5) 0.048(5) 0.045(5) 0.017(4) 0.011(4) 0.017(4)
O1 0.050(4) 0.034(3) 0.043(4) -0.005(3) 0.023(3) 0.016(3)
O2 0.061(4) 0.032(4) 0.052(4) 0.007(3) 0.026(4) 0.015(3)
O3 0.072(5) 0.040(4) 0.081(6) -0.006(4) 0.032(4) 0.027(4)
O4 0.068(5) 0.039(4) 0.061(5) 0.010(4) 0.033(4) 0.021(4)
OW1 0.081(7) 0.051(6) 0.068(6) 0.008(5) 0.008(6) 0.025(5)
OW2 0.104(7) 0.058(6) 0.070(7) 0.014(5) 0.027(6) 0.034(5)
OW3 0.092(8) 0.062(6) 0.078(8) 0.019(5) 0.013(6) 0.026(6)
OW4 0.087(9) 0.074(8) 0.087(9) -0.012(7) -0.022(7) 0.032(6)
C1 0.029(5) 0.028(4) 0.050(6) 0.003(4) -0.001(4) 0.004(4)
C2 0.028(5) 0.051(6) 0.053(6) 0.007(5) 0.002(4) 0.012(4)
C3 0.042(5) 0.051(6) 0.033(5) 0.003(4) -0.003(4) 0.018(5)
C4 0.056(6) 0.043(6) 0.036(5) 0.005(4) -0.003(5) 0.017(5)
C5 0.059(7) 0.047(6) 0.057(7) 0.032(5) 0.009(5) 0.021(5)
C6 0.042(6) 0.051(6) 0.063(7) -0.002(5) 0.003(5) 0.008(5)
C7 0.063(7) 0.039(6) 0.067(8) -0.004(5) -0.013(6) 0.017(5)
C8 0.063(7) 0.076(8) 0.040(6) 0.016(6) -0.014(5) 0.022(6)
C9 0.042(5) 0.025(4) 0.042(5) -0.003(4) -0.008(4) 0.014(4)
C10 0.033(5) 0.027(4) 0.034(5) 0.002(4) 0.001(4) 0.014(4)
C11 0.049(6) 0.032(5) 0.035(5) 0.000(4) 0.010(4) 0.018(4)
C12 0.065(7) 0.031(5) 0.064(7) 0.017(5) 0.030(6) 0.019(5)
C13 0.060(6) 0.034(5) 0.045(6) 0.010(4) 0.019(5) 0.016(5)
C14 0.037(5) 0.026(4) 0.038(5) -0.001(4) 0.004(4) 0.017(4)
C15 0.028(4) 0.031(5) 0.046(6) 0.004(4) 0.001(4) 0.009(4)
C16 0.044(6) 0.054(6) 0.048(6) -0.002(5) 0.012(5) 0.030(5)
C17 0.041(6) 0.040(6) 0.086(9) -0.015(6) -0.023(6) 0.014(5)
C18 0.046(7) 0.121(12) 0.043(7) 0.002(7) -0.013(5) 0.021(7)
C19 0.063(8) 0.056(8) 0.095(11) 0.031(7) -0.018(7) 0.007(6)
C20 0.112(10) 0.033(5) 0.055(7) 0.014(5) 0.035(7) 0.044(6)
C21 0.084(9) 0.034(6) 0.053(7) 0.005(5) 0.009(6) 0.000(6)
C22 0.160(18) 0.072(10) 0.157(18) -0.053(11) -0.104(15) 0.045(11)
C23 0.096(14) 0.18(2) 0.20(3) 0.05(2) -0.011(16) 0.054(15)
C24 0.169(19) 0.131(16) 0.16(2) 0.099(15) -0.128(17) -0.076(14)
 
_geom_special_details
;
 All s.u.'s (except the s.u. in the dihedral angle between two l.s. planes)
 are estimated using the full covariance matrix.  The cell s.u.'s are taken
 into account individually in the estimation of s.u.'s in distances, angles
 and torsion angles; correlations between s.u.'s in cell parameters are only
 used when they are defined by crystal symmetry.  An approximate (isotropic)
 treatment of cell s.u.'s is used for estimating s.u.'s involving l.s. planes.
;
 
loop_
 _geom_bond_atom_site_label_1
 _geom_bond_atom_site_label_2
 _geom_bond_distance
 _geom_bond_site_symmetry_2
 _geom_bond_publ_flag
Ni1 Ni1 8.6020(20) 1_455 ?
Ni1 Ni2 11.641(8) . ?
Ni1 Ni2 18.076(12) 1_655 ?
Ni1 Ni2 9.607(4) 1_455 ?
Ni2 Ni2 8.6020(20) 1_455 ?
Ni1 N2 2.009(7) 2_566 ?
Ni1 N2 2.009(7) . ?
Ni1 O1 2.056(6) 2_566 ?
Ni1 O1 2.056(6) . ?
Ni1 N1 2.130(7) 2_566 ?
Ni1 N1 2.130(7) . ?
Ni2 N4 1.878(8) 2_655 ?
Ni2 N4 1.878(8) . ?
Ni2 N3 1.913(7) . ?
Ni2 N3 1.913(7) 2_655 ?
Ni2 C20 2.675(9) . ?
Ni2 C20 2.675(9) 2_655 ?
N1 C5 1.438(11) . ?
N1 C1 1.519(11) . ?
N1 H1 0.9100 . ?
N2 C4 1.476(12) . ?
N2 C3 1.504(11) . ?
N2 H2 0.9100 . ?
N3 C21 1.437(13) . ?
N3 C17 1.520(13) . ?
N3 H3 0.9100 . ?
N4 C20 1.448(12) . ?
N4 C19 1.514(14) . ?
N4 H4 0.9100 . ?
O1 C9 1.254(11) . ?
O2 C9 1.238(11) . ?
O3 C16 1.196(12) . ?
O4 C16 1.239(12) . ?
OW1 HO1 1.07(10) . ?
OW1 HO2 0.70(7) . ?
OW2 HO3 1.00(11) . ?
OW2 HO4 0.89(13) . ?
OW3 HO5 0.72(17) . ?
OW3 HO6 0.82(19) . ?
OW4 HO7 0.61(7) . ?
OW4 HO8 0.82(13) . ?
C1 C7 1.428(14) . ?
C1 C2 1.477(13) 2_566 ?
C1 C6 1.555(14) . ?
C2 C1 1.477(13) 2_566 ?
C2 C3 1.548(13) . ?
C2 H2A 0.9700 . ?
C2 H2B 0.9700 . ?
C3 C8 1.487(13) . ?
C3 H3A 0.9800 . ?
C4 C5 1.565(14) . ?
C4 H4A 0.9700 . ?
C4 H4B 0.9700 . ?
C5 H5A 0.9700 . ?
C5 H5B 0.9700 . ?
C6 H6A 0.9600 . ?
C6 H6B 0.9600 . ?
C6 H6C 0.9600 . ?
C7 H7A 0.9600 . ?
C7 H7B 0.9600 . ?
C7 H7C 0.9600 . ?
C8 H8A 0.9600 . ?
C8 H8B 0.9600 . ?
C8 H8C 0.9600 . ?
C9 C10 1.449(11) . ?
C10 C15 1.371(12) . ?
C10 C11 1.391(12) . ?
C11 C12 1.311(13) . ?
C11 H11 0.9300 . ?
C12 C13 1.359(14) . ?
C12 H12 0.9300 . ?
C13 C14 1.396(12) . ?
C13 H13 0.9300 . ?
C14 C15 1.316(12) . ?
C14 C16 1.483(12) . ?
C15 H15 0.9300 . ?
C17 C18 1.500(17) . ?
C17 C22 1.522(17) . ?
C17 C23 1.53(3) . ?
C18 C19 1.467(18) . ?
C18 H18A 0.9700 . ?
C18 H18B 0.9700 . ?
C19 C24 1.56(2) . ?
C19 H19 0.9800 . ?
C20 C21 1.518(17) 2_655 ?
C20 H20A 0.9700 . ?
C20 H20B 0.9700 . ?
C21 C20 1.518(17) 2_655 ?
C21 H21A 0.9700 . ?
C21 H21B 0.9700 . ?
C22 H22A 0.9600 . ?
C22 H22B 0.9600 . ?
C22 H22C 0.9600 . ?
C23 H23A 0.9600 . ?
C23 H23B 0.9600 . ?
C23 H23C 0.9600 . ?
C24 H24A 0.9600 . ?
C24 H24B 0.9600 . ?
C24 H24C 0.9600 . ?
 
loop_
 _geom_angle_atom_site_label_1
 _geom_angle_atom_site_label_2
 _geom_angle_atom_site_label_3
 _geom_angle
 _geom_angle_site_symmetry_1
 _geom_angle_site_symmetry_3
 _geom_angle_publ_flag
N2 Ni1 N2 180.0(3) 2_566 . ?
N2 Ni1 O1 85.6(3) 2_566 2_566 ?
N2 Ni1 O1 94.4(3) . 2_566 ?
N2 Ni1 O1 94.4(3) 2_566 . ?
N2 Ni1 O1 85.6(3) . . ?
O1 Ni1 O1 180.000(2) 2_566 . ?
N2 Ni1 N1 87.0(3) 2_566 2_566 ?
N2 Ni1 N1 93.0(3) . 2_566 ?
O1 Ni1 N1 89.7(3) 2_566 2_566 ?
O1 Ni1 N1 90.3(3) . 2_566 ?
N2 Ni1 N1 93.0(3) 2_566 . ?
N2 Ni1 N1 87.0(3) . . ?
O1 Ni1 N1 90.3(3) 2_566 . ?
O1 Ni1 N1 89.7(3) . . ?
N1 Ni1 N1 180.000(1) 2_566 . ?
N4 Ni2 N4 180.0(6) 2_655 . ?
N4 Ni2 N3 88.7(4) 2_655 . ?
N4 Ni2 N3 91.3(4) . . ?
N4 Ni2 N3 91.3(4) 2_655 2_655 ?
N4 Ni2 N3 88.7(4) . 2_655 ?
N3 Ni2 N3 180.0(5) . 2_655 ?
N4 Ni2 C20 148.7(4) 2_655 . ?
N4 Ni2 C20 31.3(4) . . ?
N3 Ni2 C20 121.1(4) . . ?
N3 Ni2 C20 58.9(4) 2_655 . ?
N4 Ni2 C20 31.3(4) 2_655 2_655 ?
N4 Ni2 C20 148.7(4) . 2_655 ?
N3 Ni2 C20 58.9(4) . 2_655 ?
N3 Ni2 C20 121.1(4) 2_655 2_655 ?
C20 Ni2 C20 180.0(5) . 2_655 ?
C5 N1 C1 116.8(7) . . ?
C5 N1 Ni1 104.1(6) . . ?
C1 N1 Ni1 124.5(5) . . ?
C5 N1 H1 102.8 . . ?
C1 N1 H1 102.8 . . ?
Ni1 N1 H1 102.8 . . ?
C4 N2 C3 115.3(7) . . ?
C4 N2 Ni1 106.1(5) . . ?
C3 N2 Ni1 118.0(5) . . ?
C4 N2 H2 105.4 . . ?
C3 N2 H2 105.4 . . ?
Ni1 N2 H2 105.4 . . ?
C21 N3 C17 108.6(9) . . ?
C21 N3 Ni2 108.0(6) . . ?
C17 N3 Ni2 124.5(6) . . ?
C21 N3 H3 104.6 . . ?
C17 N3 H3 104.6 . . ?
Ni2 N3 H3 104.6 . . ?
C20 N4 C19 109.5(9) . . ?
C20 N4 Ni2 106.3(7) . . ?
C19 N4 Ni2 122.6(7) . . ?
C20 N4 H4 105.8 . . ?
C19 N4 H4 105.8 . . ?
Ni2 N4 H4 105.8 . . ?
C9 O1 Ni1 133.7(6) . . ?
HO1 OW1 HO2 69(8) . . ?
HO3 OW2 HO4 118(10) . . ?
HO5 OW3 HO6 145(10) . . ?
HO7 OW4 HO8 145(10) . . ?
C7 C1 C2 109.3(9) . 2_566 ?
C7 C1 N1 112.9(8) . . ?
C2 C1 N1 107.3(7) 2_566 . ?
C7 C1 C6 109.8(8) . . ?
C2 C1 C6 108.2(8) 2_566 . ?
N1 C1 C6 109.1(8) . . ?
C1 C2 C3 121.1(8) 2_566 . ?
C1 C2 H2A 107.0 2_566 . ?
C3 C2 H2A 107.0 . . ?
C1 C2 H2B 107.0 2_566 . ?
C3 C2 H2B 107.0 . . ?
H2A C2 H2B 106.8 . . ?
C8 C3 N2 115.7(9) . . ?
C8 C3 C2 109.9(8) . . ?
N2 C3 C2 111.0(8) . . ?
C8 C3 H3A 106.6 . . ?
N2 C3 H3A 106.6 . . ?
C2 C3 H3A 106.6 . . ?
N2 C4 C5 109.6(8) . . ?
N2 C4 H4A 109.7 . . ?
C5 C4 H4A 109.7 . . ?
N2 C4 H4B 109.7 . . ?
C5 C4 H4B 109.7 . . ?
H4A C4 H4B 108.2 . . ?
N1 C5 C4 109.7(8) . . ?
N1 C5 H5A 109.7 . . ?
C4 C5 H5A 109.7 . . ?
N1 C5 H5B 109.7 . . ?
C4 C5 H5B 109.7 . . ?
H5A C5 H5B 108.2 . . ?
C1 C6 H6A 109.5 . . ?
C1 C6 H6B 109.5 . . ?
H6A C6 H6B 109.5 . . ?
C1 C6 H6C 109.5 . . ?
H6A C6 H6C 109.5 . . ?
H6B C6 H6C 109.5 . . ?
C1 C7 H7A 109.5 . . ?
C1 C7 H7B 109.5 . . ?
H7A C7 H7B 109.5 . . ?
C1 C7 H7C 109.5 . . ?
H7A C7 H7C 109.5 . . ?
H7B C7 H7C 109.5 . . ?
C3 C8 H8A 109.5 . . ?
C3 C8 H8B 109.5 . . ?
H8A C8 H8B 109.5 . . ?
C3 C8 H8C 109.5 . . ?
H8A C8 H8C 109.5 . . ?
H8B C8 H8C 109.5 . . ?
O2 C9 O1 127.7(8) . . ?
O2 C9 C10 117.1(9) . . ?
O1 C9 C10 115.1(8) . . ?
C15 C10 C11 120.9(8) . . ?
C15 C10 C9 119.9(8) . . ?
C11 C10 C9 119.1(8) . . ?
C12 C11 C10 118.5(9) . . ?
C12 C11 H11 120.8 . . ?
C10 C11 H11 120.8 . . ?
C11 C12 C13 119.3(9) . . ?
C11 C12 H12 120.3 . . ?
C13 C12 H12 120.3 . . ?
C12 C13 C14 124.0(9) . . ?
C12 C13 H13 118.0 . . ?
C14 C13 H13 118.0 . . ?
C15 C14 C13 115.3(8) . . ?
C15 C14 C16 120.5(9) . . ?
C13 C14 C16 124.1(8) . . ?
C14 C15 C10 121.9(9) . . ?
C14 C15 H15 119.1 . . ?
C10 C15 H15 119.1 . . ?
O3 C16 O4 122.6(9) . . ?
O3 C16 C14 116.1(10) . . ?
O4 C16 C14 121.2(9) . . ?
C18 C17 N3 106.2(8) . . ?
C18 C17 C22 107.1(13) . . ?
N3 C17 C22 112.3(9) . . ?
C18 C17 C23 113.6(12) . . ?
N3 C17 C23 103.4(12) . . ?
C22 C17 C23 114.0(14) . . ?
C19 C18 C17 115.0(11) . . ?
C19 C18 H18A 108.5 . . ?
C17 C18 H18A 108.5 . . ?
C19 C18 H18B 108.5 . . ?
C17 C18 H18B 108.5 . . ?
H18A C18 H18B 107.5 . . ?
C18 C19 N4 109.6(10) . . ?
C18 C19 C24 103.0(14) . . ?
N4 C19 C24 107.5(10) . . ?
C18 C19 H19 112.1 . . ?
N4 C19 H19 112.1 . . ?
C24 C19 H19 112.1 . . ?
N4 C20 C21 108.0(8) . 2_655 ?
N4 C20 Ni2 42.4(4) . . ?
C21 C20 Ni2 75.6(6) 2_655 . ?
N4 C20 H20A 110.1 . . ?
C21 C20 H20A 110.1 2_655 . ?
Ni2 C20 H20A 148.8 . . ?
N4 C20 H20B 110.1 . . ?
C21 C20 H20B 110.1 2_655 . ?
Ni2 C20 H20B 97.3 . . ?
H20A C20 H20B 108.4 . . ?
N3 C21 C20 105.3(9) . 2_655 ?
N3 C21 H21A 110.7 . . ?
C20 C21 H21A 110.7 2_655 . ?
N3 C21 H21B 110.7 . . ?
C20 C21 H21B 110.7 2_655 . ?
H21A C21 H21B 108.8 . . ?
C17 C22 H22A 109.5 . . ?
C17 C22 H22B 109.5 . . ?
H22A C22 H22B 109.5 . . ?
C17 C22 H22C 109.5 . . ?
H22A C22 H22C 109.5 . . ?
H22B C22 H22C 109.5 . . ?
C17 C23 H23A 109.5 . . ?
C17 C23 H23B 109.5 . . ?
H23A C23 H23B 109.5 . . ?
C17 C23 H23C 109.5 . . ?
H23A C23 H23C 109.5 . . ?
H23B C23 H23C 109.5 . . ?
C19 C24 H24A 109.5 . . ?
C19 C24 H24B 109.5 . . ?
H24A C24 H24B 109.5 . . ?
C19 C24 H24C 109.5 . . ?
H24A C24 H24C 109.5 . . ?
H24B C24 H24C 109.5 . . ?
 
loop_
 _geom_torsion_atom_site_label_1
 _geom_torsion_atom_site_label_2
 _geom_torsion_atom_site_label_3
 _geom_torsion_atom_site_label_4
 _geom_torsion
 _geom_torsion_site_symmetry_1
 _geom_torsion_site_symmetry_2
 _geom_torsion_site_symmetry_3
 _geom_torsion_site_symmetry_4
 _geom_torsion_publ_flag
N2 Ni1 N1 C5 165.9(6) 2_566 . . . ?
N2 Ni1 N1 C5 -14.1(6) . . . . ?
O1 Ni1 N1 C5 -108.5(6) 2_566 . . . ?
O1 Ni1 N1 C5 71.5(6) . . . . ?
N1 Ni1 N1 C5 108(100) 2_566 . . . ?
N2 Ni1 N1 C1 28.4(6) 2_566 . . . ?
N2 Ni1 N1 C1 -151.6(6) . . . . ?
O1 Ni1 N1 C1 114.1(6) 2_566 . . . ?
O1 Ni1 N1 C1 -65.9(6) . . . . ?
N1 Ni1 N1 C1 -29(100) 2_566 . . . ?
N2 Ni1 N2 C4 16(100) 2_566 . . . ?
O1 Ni1 N2 C4 75.3(6) 2_566 . . . ?
O1 Ni1 N2 C4 -104.7(6) . . . . ?
N1 Ni1 N2 C4 165.2(6) 2_566 . . . ?
N1 Ni1 N2 C4 -14.8(6) . . . . ?
N2 Ni1 N2 C3 -116(100) 2_566 . . . ?
O1 Ni1 N2 C3 -55.9(7) 2_566 . . . ?
O1 Ni1 N2 C3 124.1(7) . . . . ?
N1 Ni1 N2 C3 34.0(7) 2_566 . . . ?
N1 Ni1 N2 C3 -146.0(7) . . . . ?
N4 Ni2 N3 C21 -13.1(8) 2_655 . . . ?
N4 Ni2 N3 C21 166.9(8) . . . . ?
N3 Ni2 N3 C21 -90(100) 2_655 . . . ?
C20 Ni2 N3 C21 157.0(7) . . . . ?
C20 Ni2 N3 C21 -23.0(7) 2_655 . . . ?
N4 Ni2 N3 C17 -142.3(9) 2_655 . . . ?
N4 Ni2 N3 C17 37.7(9) . . . . ?
N3 Ni2 N3 C17 141(100) 2_655 . . . ?
C20 Ni2 N3 C17 27.8(9) . . . . ?
C20 Ni2 N3 C17 -152.2(9) 2_655 . . . ?
N4 Ni2 N4 C20 0(100) 2_655 . . . ?
N3 Ni2 N4 C20 -163.4(7) . . . . ?
N3 Ni2 N4 C20 16.6(7) 2_655 . . . ?
C20 Ni2 N4 C20 180.0 2_655 . . . ?
N4 Ni2 N4 C19 0(100) 2_655 . . . ?
N3 Ni2 N4 C19 -36.6(10) . . . . ?
N3 Ni2 N4 C19 143.4(10) 2_655 . . . ?
C20 Ni2 N4 C19 126.8(13) . . . . ?
C20 Ni2 N4 C19 -53.2(13) 2_655 . . . ?
N2 Ni1 O1 C9 71.9(9) 2_566 . . . ?
N2 Ni1 O1 C9 -108.1(9) . . . . ?
O1 Ni1 O1 C9 -141(100) 2_566 . . . ?
N1 Ni1 O1 C9 -15.1(9) 2_566 . . . ?
N1 Ni1 O1 C9 164.9(9) . . . . ?
C5 N1 C1 C7 -53.6(11) . . . . ?
Ni1 N1 C1 C7 79.1(9) . . . . ?
C5 N1 C1 C2 -174.1(8) . . . 2_566 ?
Ni1 N1 C1 C2 -41.5(9) . . . 2_566 ?
C5 N1 C1 C6 68.8(10) . . . . ?
Ni1 N1 C1 C6 -158.5(6) . . . . ?
C4 N2 C3 C8 50.9(11) . . . . ?
Ni1 N2 C3 C8 177.9(7) . . . . ?
C4 N2 C3 C2 177.1(8) . . . . ?
Ni1 N2 C3 C2 -56.0(9) . . . . ?
C1 C2 C3 C8 -156.0(10) 2_566 . . . ?
C1 C2 C3 N2 74.8(12) 2_566 . . . ?
C3 N2 C4 C5 172.6(8) . . . . ?
Ni1 N2 C4 C5 39.9(8) . . . . ?
C1 N1 C5 C4 -179.7(8) . . . . ?
Ni1 N1 C5 C4 38.9(9) . . . . ?
N2 C4 C5 N1 -55.7(11) . . . . ?
Ni1 O1 C9 O2 0.7(16) . . . . ?
Ni1 O1 C9 C10 176.4(6) . . . . ?
O2 C9 C10 C15 -11.3(13) . . . . ?
O1 C9 C10 C15 172.5(8) . . . . ?
O2 C9 C10 C11 168.3(9) . . . . ?
O1 C9 C10 C11 -8.0(12) . . . . ?
C15 C10 C11 C12 -0.3(15) . . . . ?
C9 C10 C11 C12 -179.9(9) . . . . ?
C10 C11 C12 C13 1.0(16) . . . . ?
C11 C12 C13 C14 -2.0(18) . . . . ?
C12 C13 C14 C15 2.0(15) . . . . ?
C12 C13 C14 C16 179.2(10) . . . . ?
C13 C14 C15 C10 -1.2(13) . . . . ?
C16 C14 C15 C10 -178.5(8) . . . . ?
C11 C10 C15 C14 0.5(14) . . . . ?
C9 C10 C15 C14 -180.0(8) . . . . ?
C15 C14 C16 O3 -178.3(9) . . . . ?
C13 C14 C16 O3 4.6(15) . . . . ?
C15 C14 C16 O4 1.2(15) . . . . ?
C13 C14 C16 O4 -175.9(10) . . . . ?
C21 N3 C17 C18 176.6(9) . . . . ?
Ni2 N3 C17 C18 -54.4(12) . . . . ?
C21 N3 C17 C22 59.8(15) . . . . ?
Ni2 N3 C17 C22 -171.2(11) . . . . ?
C21 N3 C17 C23 -63.6(13) . . . . ?
Ni2 N3 C17 C23 65.4(13) . . . . ?
N3 C17 C18 C19 67.1(13) . . . . ?
C22 C17 C18 C19 -172.7(12) . . . . ?
C23 C17 C18 C19 -45.9(16) . . . . ?
C17 C18 C19 N4 -69.2(14) . . . . ?
C17 C18 C19 C24 176.6(13) . . . . ?
C20 N4 C19 C18 -178.9(10) . . . . ?
Ni2 N4 C19 C18 55.7(14) . . . . ?
C20 N4 C19 C24 -67.6(17) . . . . ?
Ni2 N4 C19 C24 167.0(13) . . . . ?
C19 N4 C20 C21 -176.1(10) . . . 2_655 ?
Ni2 N4 C20 C21 -41.7(10) . . . 2_655 ?
C19 N4 C20 Ni2 -134.3(10) . . . . ?
N4 Ni2 C20 N4 180.0 2_655 . . . ?
N3 Ni2 C20 N4 19.5(8) . . . . ?
N3 Ni2 C20 N4 -160.5(8) 2_655 . . . ?
C20 Ni2 C20 N4 -144(100) 2_655 . . . ?
N4 Ni2 C20 C21 -40.8(10) 2_655 . . 2_655 ?
N4 Ni2 C20 C21 139.2(10) . . . 2_655 ?
N3 Ni2 C20 C21 158.7(6) . . . 2_655 ?
N3 Ni2 C20 C21 -21.3(6) 2_655 . . 2_655 ?
C20 Ni2 C20 C21 -5(100) 2_655 . . 2_655 ?
C17 N3 C21 C20 175.4(8) . . . 2_655 ?
Ni2 N3 C21 C20 37.8(10) . . . 2_655 ?
 
loop_
 _geom_hbond_atom_site_label_D
 _geom_hbond_atom_site_label_H
 _geom_hbond_atom_site_label_A
 _geom_hbond_distance_DH
 _geom_hbond_distance_HA
 _geom_hbond_distance_DA
 _geom_hbond_angle_DHA
 _geom_hbond_site_symmetry_A
N1 H1 O2  0.91 1.95 2.804(10) 154.6 2_566
N3 H3 O4  0.91 1.98 2.869(10) 164.0 .
N4 H4 O3  0.91 1.98 2.841(11) 157.8 .
OW1 HO1 O4  1.07(10) 1.65(11) 2.676(11) 160(9) .
OW2 HO3 O2  1.00(11) 1.76(11) 2.734(12) 163(9) .
OW2 HO4 OW1  0.89(13) 1.92(13) 2.706(14) 147(11) .
OW4 HO8 OW1  0.82(13) 2.12(14) 2.829(17) 145(13) 2_655
 
_diffrn_measured_fraction_theta_max    0.889
_diffrn_reflns_theta_full              26.37
_diffrn_measured_fraction_theta_full   0.889
_refine_diff_density_max    1.731
_refine_diff_density_min   -1.199
_refine_diff_density_rms    0.210
